# Supplementary material for: Network localization of heterogeneous neuroimaging findings
Source: Oxford University Press journal article supplement (doi:10.1093/brain/awy292), 2018-10-25
Supplement: awy292_supplementary_materials.pdf [file awy292_supplementary_materials.pdf]

**Supplementary Materials:**

Supplementary Tables S1-5

Supplementary Figure S1-S4

Supplementary References

**Table S1: Dementia Studies**

| Reference                                             | Imaging Modality | Contrast        |
|-------------------------------------------------------|------------------|-----------------|
| <i>Alzheimer's Disease</i>                            |                  |                 |
| Baron et al, 2001 (Baron <i>et al.</i> , 2001)        | MRI, atrophy     | AD vs. controls |
| Boxer et al, 2003a (A. L. Boxer <i>et al.</i> , 2003) | MRI, atrophy     | AD vs. controls |
| Boxer et al, 2003b (A. L. Boxer <i>et al.</i> , 2003) | MRI, atrophy     | AD vs. controls |
| Bozzali et al, 2006 (Bozzali <i>et al.</i> , 2006)    | MRI, atrophy     | AD vs. controls |
| Grossman et al, 2004 (Grossman <i>et al.</i> , 2004)  | MRI, atrophy     | AD vs. controls |
| Ohnishi et al, 2001 (Ohnishi <i>et al.</i> , 2001)    | MRI, atrophy     | AD vs. controls |
| Matsuda et al, 2002 (Matsuda <i>et al.</i> , 2002)    | MRI, atrophy     | AD vs. controls |
| Zahn et al, 2005 (Zahn <i>et al.</i> , 2005)          | MRI, atrophy     | AD vs. controls |
| Benoit et al, 2002 (Benoit <i>et al.</i> , 2002)      | SPECT, perfusion | AD vs. controls |
| Ebmeier et al, 1998 (Ebmeier <i>et al.</i> , 1998)    | SPECT, perfusion | AD vs. controls |
| Ishii et al, 1997 (Ishii <i>et al.</i> , 1997)        | SPECT, perfusion | AD vs. controls |
| Kogure et al, 2000 (Kogure <i>et al.</i> , 2000)      | SPECT, perfusion | AD vs. controls |
| Lee et al, 2003 (Lee <i>et al.</i> , 2003)            | SPECT, perfusion | AD vs. controls |
| Matsuda et al, 2009 (Matsuda <i>et al.</i> , 2002)    | SPECT, perfusion | AD vs. controls |

|                                                         |                  |                  |
|---------------------------------------------------------|------------------|------------------|
| Nakano et al, 2005 (Nakano <i>et al.</i> , 2005)        | SPECT, perfusion | AD vs. controls  |
| Sakamoto et al, 2003 (Sakamoto <i>et al.</i> , 2002)    | SPECT, perfusion | AD vs. controls  |
| Ibanez et al, 1998 (Ibáñez <i>et al.</i> , 1998)        | PET, metabolism  | AD vs. controls  |
| Ishii et al, 1998 (Ishii <i>et al.</i> , 1998)          | PET, metabolism  | AD vs. controls  |
| Ishii et al, 2005 (Ishii <i>et al.</i> , 2005)          | PET, metabolism  | AD vs. controls  |
| Kalpouzos et al, 2005 (Kalpouzos <i>et al.</i> , 2005)  | PET, metabolism  | AD vs. controls  |
| Kim et al, 2005 (Kim <i>et al.</i> , 2005)              | PET, metabolism  | AD vs. controls  |
| Mosconi et al, 2004 (Mosconi <i>et al.</i> , 2004)      | PET, metabolism  | AD vs. controls  |
| Sakamoto et al, 2002 (Sakamoto <i>et al.</i> , 2002)    | PET, metabolism  | AD vs. controls  |
| Salmon et al, 2000 (Salmon <i>et al.</i> , 2000)        | PET, metabolism  | AD vs. controls  |
| Zahn et al, 2005 (Zahn <i>et al.</i> , 2005)            | PET, metabolism  | AD vs. controls  |
| <i>Frontotemporal Dementia</i>                          |                  |                  |
| Amanzio et al, 2016 (Amanzio <i>et al.</i> , 2016)      | MRI, atrophy     | FTD vs. controls |
| Baez et al, 2016a (Baez, Kanske, <i>et al.</i> , 2016)  | MRI, atrophy     | FTD vs. controls |
| Baez et al, 2016b (Baez, Morales, <i>et al.</i> , 2016) | MRI, atrophy     | FTD vs. controls |
| Boccardi et al, 2005 (Boccardi <i>et al.</i> , 2005)    | MRI, atrophy     | FTD vs. controls |

|                                                               |              |                  |
|---------------------------------------------------------------|--------------|------------------|
| Dermody et al, 2016 (Dermody <i>et al.</i> , 2016)            | MRI, atrophy | FTD vs. controls |
| Flannagan et al, 2016 (Flanagan <i>et al.</i> , 2016)         | MRI, atrophy | FTD vs. controls |
| Grossman et al, 2004 (Grossman <i>et al.</i> , 2004)          | MRI, atrophy | FTD vs. controls |
| Irish et al, 2013 (Irish <i>et al.</i> , 2013)                | MRI, atrophy | FTD vs. controls |
| Irish et al, 2014 (Irish <i>et al.</i> , 2014)                | MRI, atrophy | FTD vs. controls |
| Irish et al, 2016 (Irish <i>et al.</i> , 2016)                | MRI, atrophy | FTD vs. controls |
| Kanda et al, 2008 (Kanda <i>et al.</i> , 2008)                | MRI, atrophy | FTD vs. controls |
| Kipps et al, 2009 (Kipps <i>et al.</i> , 2009)                | MRI, atrophy | FTD vs. controls |
| Luis et al, 2016 (Luis <i>et al.</i> , 2016)                  | MRI, atrophy | FTD vs. controls |
| Mandelli et al, 2016 (Mandelli, Vitali, <i>et al.</i> , 2016) | MRI, atrophy | FTD vs. controls |
| Massimo et al, 2013 (Massimo <i>et al.</i> , 2013)            | MRI, atrophy | FTD vs. controls |
| Ossenkoppele et al, 2015 (Ossenkoppele <i>et al.</i> , 2015)  | MRI, atrophy | FTD vs. controls |
| Pardini et al, 2009 (Pardini <i>et al.</i> , 2009)            | MRI, atrophy | FTD vs. controls |
| Tu et al, 2015 (Tu <i>et al.</i> , 2015)                      | MRI, atrophy | FTD vs. controls |
| Whitwell et al, 2011 (Whitwell <i>et al.</i> , 2011)          | MRI, atrophy | FTD vs. controls |
| Wong et al, 2016 (Wong <i>et al.</i> , 2016)                  | MRI, atrophy | FTD vs. controls |

|                                                                |              |                   |
|----------------------------------------------------------------|--------------|-------------------|
| Zamboni et al, 2008 (Zamboni <i>et al.</i> , 2008)             | MRI, atrophy | FTD vs. controls  |
| <i>Corticobasal Syndrome</i>                                   |              |                   |
| Boxer et al, 2006 (Boxer <i>et al.</i> , 2006)                 | MRI, atrophy | CBS vs. controls  |
| Garraux et al, 2000 (Garraux <i>et al.</i> , 2000)             | MRI, atrophy | CBS vs. controls  |
| Gross et al, 2010 (Gross <i>et al.</i> , 2010)                 | MRI, atrophy | CBS vs. controls  |
| Grossman et al, 2004 (Grossman <i>et al.</i> , 2004)           | MRI, atrophy | CBS vs. controls  |
| Huey et al, 2009 (Huey <i>et al.</i> , 2009)                   | MRI, atrophy | CBS vs. controls  |
| Hosaka et al, 2002 (Hosaka <i>et al.</i> , 2002)               | MRI, atrophy | CBS vs. controls  |
| Juh et al, 2005 (Juh <i>et al.</i> , n.d.)                     | MRI, atrophy | CBS vs. controls  |
| Lee et al, 2011 (Lee <i>et al.</i> , 2011)                     | MRI, atrophy | CBS vs. controls  |
| McMillan et al, 2016 (McMillan <i>et al.</i> , 2016)           | MRI, atrophy | CBS vs. controls  |
| Morgan et al, 2011 (Morgan <i>et al.</i> , 2011)               | MRI, atrophy | CBS vs. controls  |
| Pardini et al, 2009 (Pardini <i>et al.</i> , 2009)             | MRI, atrophy | CBS vs. controls  |
| Wolpe et al, 2014 (Wolpe <i>et al.</i> , 2014)                 | MRI, atrophy | CBS vs. controls  |
| <i>Progressive Non-Fluent Aphasia</i>                          |              |                   |
| Gorno-Tempini et al, 2004 (Gorno-Tempini <i>et al.</i> , 2004) | MRI, atrophy | PNFA vs. controls |
| Gorno-Tempini et al, 2006 (Gorno-Tempini <i>et al.</i> , 2006) | MRI, atrophy | PNFA vs. controls |

|                                                           |                  |                               |
|-----------------------------------------------------------|------------------|-------------------------------|
| Grossman et al, 2004<br>(Grossman <i>et al.</i> , 2004)   | MRI, atrophy     | PNFA vs. controls             |
| Hu et al, 2010 (Hu <i>et al.</i> , 2010)                  | MRI, atrophy     | PNFA vs. controls             |
| Nestor et al, 2003 (Nestor <i>et al.</i> , 2003)          | MRI, atrophy     | PNFA vs. controls             |
| Pereira et al, 2009 (Pereira <i>et al.</i> , 2009)        | MRI, atrophy     | PNFA vs. controls             |
| Wilson et al, 2010 (Wilson <i>et al.</i> , 2010)          | MRI, atrophy     | PNFA vs. controls             |
| Zahn et al, 2005 (Zahn <i>et al.</i> , 2005)              | MRI, atrophy     | PNFA vs. controls             |
| <i>AD with Delusions</i>                                  |                  |                               |
| Bruen et al, 2008 (Bruen <i>et al.</i> , 2008)            | MRI, atrophy     | AD with vs. without delusions |
| Fukuhara et al, 2001 (Fukuhara <i>et al.</i> , 2001)      | SPECT, perfusion | AD with vs. without delusions |
| Lee et al, 2016 (Lee <i>et al.</i> , 2016)                | MRI, atrophy     | AD with vs. without delusions |
| Mega et al, 2000 (Mega <i>et al.</i> , 2000)              | SPECT, perfusion | AD with vs. without delusions |
| Moran et al, 2008 (Moran <i>et al.</i> , 2008)            | SPECT, perfusion | AD with vs. without delusions |
| Nakaaki et al, 2013 (Nakaaki <i>et al.</i> , 2013)        | MRI, atrophy     | AD with vs. without delusions |
| Nakatsuka et al, 2013<br>(Nakatsuka <i>et al.</i> , 2013) | SPECT, perfusion | AD with vs. without delusions |
| Serra et al, 2010 (Serra <i>et al.</i> , 2010)            | MRI, atrophy     | AD with vs. without delusions |
| Staff et al, 2000 (Staff <i>et al.</i> , 2000)            | SPECT, perfusion | AD with vs. without delusions |
| Matsuoka et al, 2010                                      | SPECT, perfusion | AD with vs. without delusions |

|                                                    |                  |                               |
|----------------------------------------------------|------------------|-------------------------------|
| (Matsuoka <i>et al.</i> , 2010)                    |                  |                               |
| Nakano et al, 2006 (Nakano <i>et al.</i> , 2006)   | SPECT, perfusion | AD with vs. without delusions |
| Sultzer et al, 2014 (Sultzer <i>et al.</i> , 2014) | PET, metabolism  | AD with vs. without delusions |

**Table S2: Shared network localization across PET, SPECT, and MRI studies in AD**

| Voxels | Overlap | X   | Y   | Z   | Region                                 |
|--------|---------|-----|-----|-----|----------------------------------------|
| 1769   | 26/26   | -2  | -54 | 14  | Precuneus / Posterior Cingulate Cortex |
| 449    | 25/26   | -48 | -64 | 24  | Angular Gyrus                          |
| 355    | 25/26   | 60  | -60 | 24  | Angular Gyrus                          |
| 240    | 25/26   | 0   | 44  | -10 | Paracingulate Gyrus                    |
| 145    | 25/26   | 56  | -2  | -20 | Middle Temporal Gyrus                  |
| 130    | 25/26   | -56 | -4  | -22 | Middle Temporal Gyrus                  |
| 62     | 25/26   | -18 | 28  | 44  | Superior frontal gyrus                 |
| 18     | 25/26   | 28  | -22 | -16 | Hippocampus                            |
| 18     | 25/26   | -24 | -22 | -20 | Hippocampus                            |



**Table S3: Distinct network localization for AD, FTD, CBS, and PNFA**

| Voxels                   | Cluster P (FWE) | Max T | X   | Y   | Z   | Region                              |
|--------------------------|-----------------|-------|-----|-----|-----|-------------------------------------|
| <i>AD vs. non-AD</i>     |                 |       |     |     |     |                                     |
| 24650                    | <0.001          | 6.45  | 36  | -44 | 16  | Supra-marginal Gyrus                |
|                          |                 | 6.28  | -30 | -32 | -14 | Parahippocampal Gyrus               |
|                          |                 | 6.22  | 30  | -32 | -14 | Parahippocampal Gyrus               |
| <i>FTD vs. non-FTD</i>   |                 |       |     |     |     |                                     |
| 2847                     | <0.001          | 4.70  | 32  | -14 | -10 | Right putamen / amygdala            |
|                          |                 | 4.53  | 18  | 36  | -10 | Frontal Pole / Orbitofrontal Cortex |
|                          |                 | 4.43  | 24  | 52  | -16 | Frontal Pole                        |
| <i>CBS vs. non-CBS</i>   |                 |       |     |     |     |                                     |
| 18232                    | <0.001          | 6.73  | 6   | -40 | 76  | Post-central Gyrus, Precuneus       |
|                          |                 | 6.37  | 48  | -26 | 50  | Post-central, supramarginal gyrus   |
|                          |                 | 6.32  | 42  | -24 | 42  | Post-central, supramarginal gyrus   |
| 3367                     | <0.001          | 6.07  | -18 | -12 | 48  | Pre-central, superior frontal gyrus |
|                          |                 | 5.83  | -26 | -12 | 62  | Pre-central, superior frontal gyrus |
|                          |                 | 5.79  | -24 | -18 | 52  | Pre-central, superior frontal gyrus |
| <i>PNFA vs. non-PNFA</i> |                 |       |     |     |     |                                     |

|      |       |      |     |    |     |                                                           |
|------|-------|------|-----|----|-----|-----------------------------------------------------------|
| 2731 | 0.003 | 6.06 | -54 | 16 | 2   | Left inferior frontal gyrus                               |
|      |       | 5.26 | -38 | 36 | -2  | Left orbitofrontal, inferior frontal gyrus                |
|      |       | 5.08 | -52 | 20 | -14 | Left temporal pole, orbitofrontal, inferior frontal gyrus |

Cortical / subcortical gray voxels showing significantly stronger connectivity to neuroimaging findings in AD, FTD, CBS, or PNFA vs. all other dementia syndromes. Peak voxel coordinates and T-values are reported for up to 3 local maxima more than 8mm apart for each cluster.

**Table S5: Network localization of delusions vs. no delusions in AD patients**

| Voxels      | Cluster P (FWE) | Max T | X   | Y   | Z  | Region                                               |
|-------------|-----------------|-------|-----|-----|----|------------------------------------------------------|
| <b>7305</b> | <0.001          | 6.83  | 50  | 2   | 52 | Right precentral, middle frontal gyrus               |
|             |                 | 6.74  | 42  | -2  | 60 | Right precentral, Middle frontal gyrus               |
|             |                 | 6.62  | 30  | 32  | 2  | Right inferior frontal, insula, orbitofrontal cortex |
| <b>1883</b> | 0.005           | 6.48  | 62  | -26 | 52 | Right supramarginal gyrus                            |
|             |                 | 5.78  | 56  | -30 | 40 | Right supramarginal gyrus                            |
|             |                 | 5.2   | 40  | -48 | 68 | Right superior parietal lobule                       |
| <b>1634</b> | 0.006           | 5.27  | -62 | 10  | 10 | Left precentral gyrus, inferior frontal gyrus        |
|             |                 | 5.01  | -32 | 20  | 6  | Left insula, frontal operculum                       |
|             |                 | 4.61  | -46 | 12  | 0  | Left inferior frontal gyrus, frontal operculum       |
| <b>1123</b> | 0.02            | 5.1   | -64 | -30 | 46 | Left supramarginal gyrus                             |
|             |                 | 4.97  | -68 | -22 | 32 | Left supramarginal gyrus                             |

Cortical / subcortical gray voxels showing significantly stronger connectivity to neuroimaging findings in AD with delusion vs. without delusions. Peak voxel coordinates and T-values are reported for up to 3 local maxima more than 8mm apart for each cluster.

**A. Seed Size**

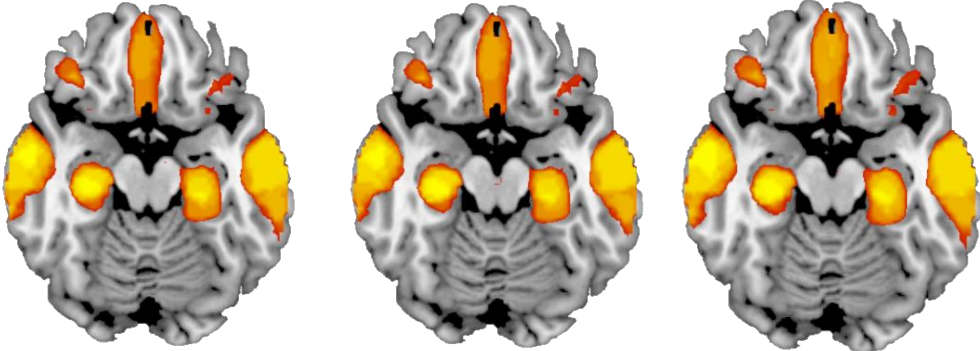

**B. Threshold**

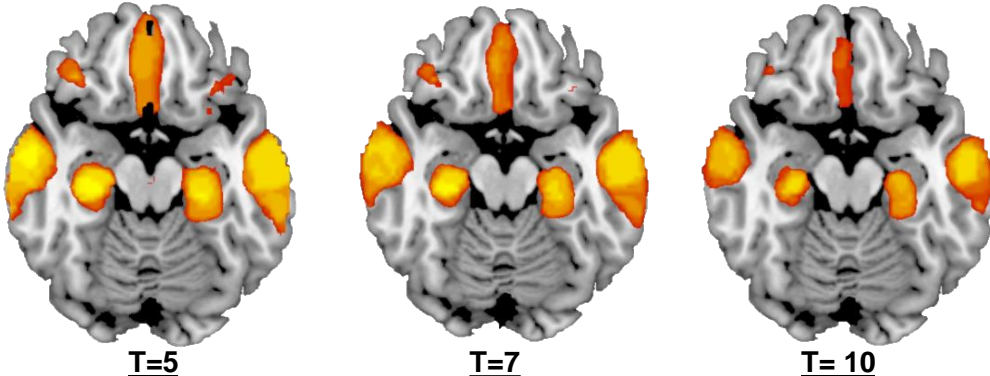

**Supplementary Figure S1: Effects of changing seed size and network map threshold on reproducibility of network localization in AD.**

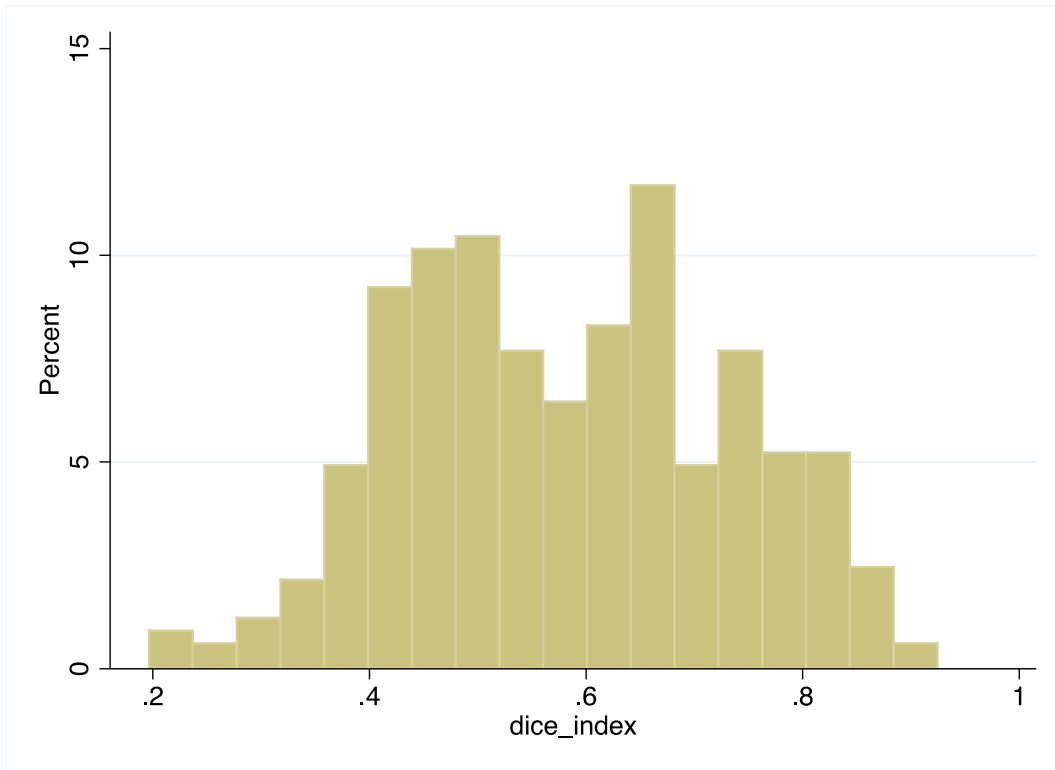

**Supplementary Figure S2: distribution of dice indices between connectivity maps from studies of patients with Alzheimer's disease.**

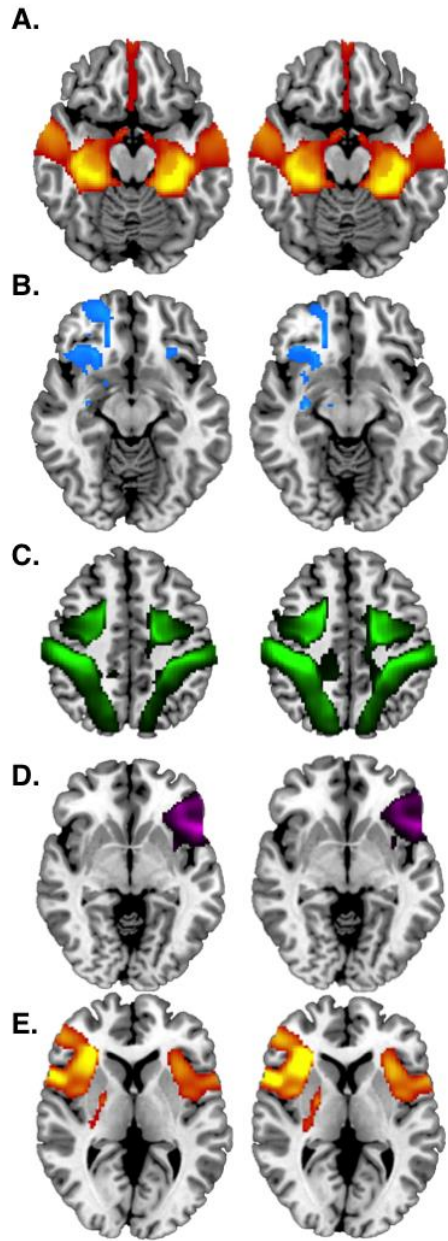

**Figure S3: Specificity of network localization using parametric and nonparametric testing.** Results did not differ when using standard settings to control for multiple comparisons using parametric testing (left) vs. nonparametric testing (right) for: (A) AD vs. other dementias; (B) FTD vs. other dementias; (C) CBS vs. other dementias; (D) PNFA vs. other dementias; or (E) AD+ delusions vs. AD – delusions.

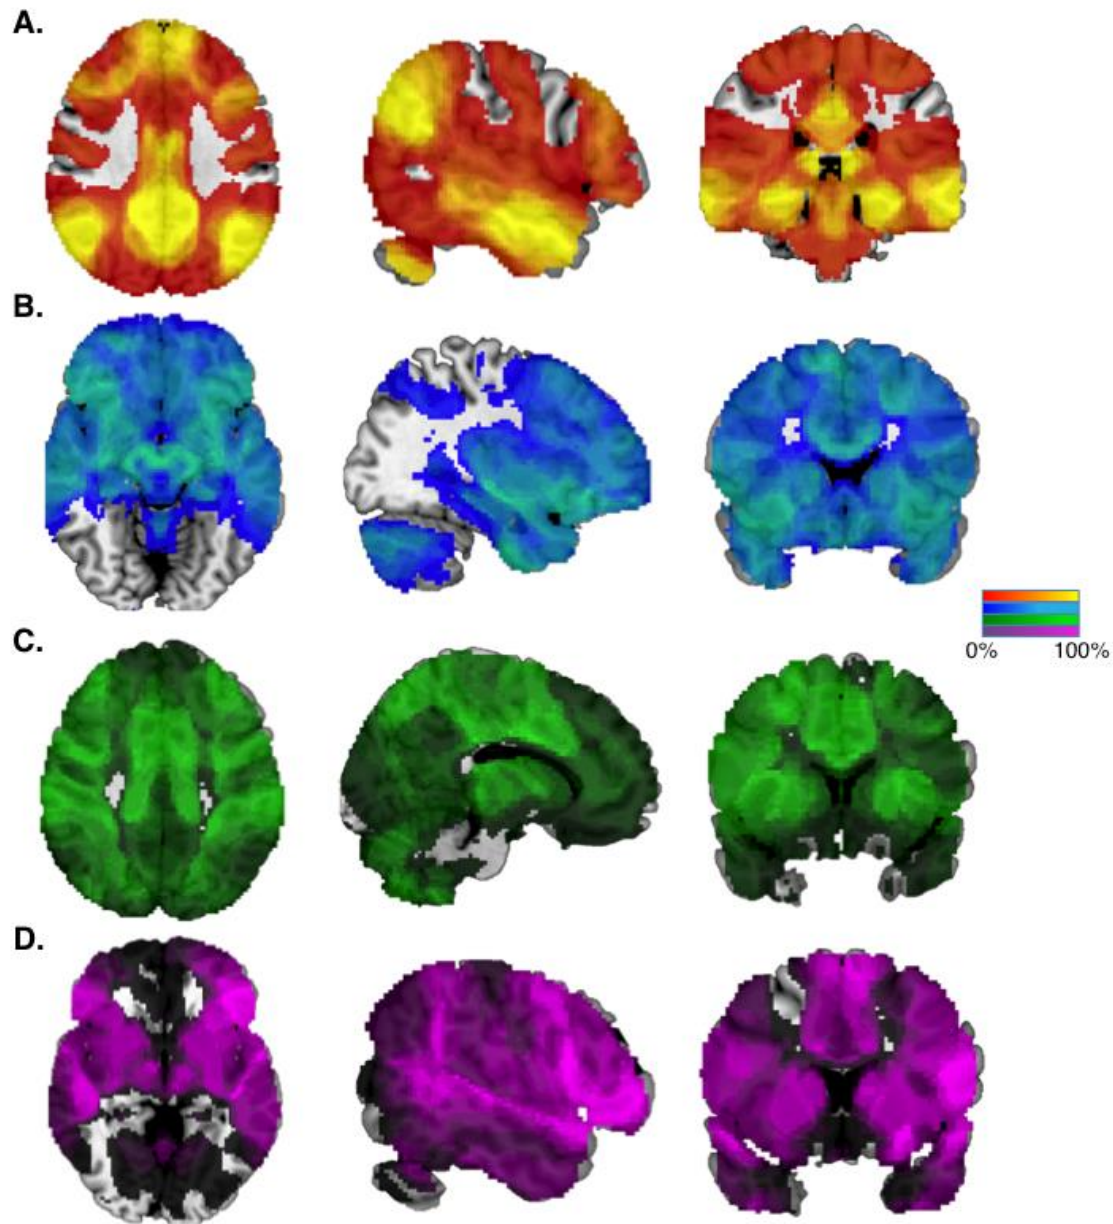

**Supplementary Figure 4: Network Localization Overlap for neuroimaging abnormalities in neurodegenerative disorders.** Percentage of connectivity maps from studies of patients with a clinical diagnosis of Alzheimer's disease (A), behavioral-variant frontotemporal dementia (B), Corticobasal syndrome (C), or progressive nonfluent aphasia (D) connected to each brain region.

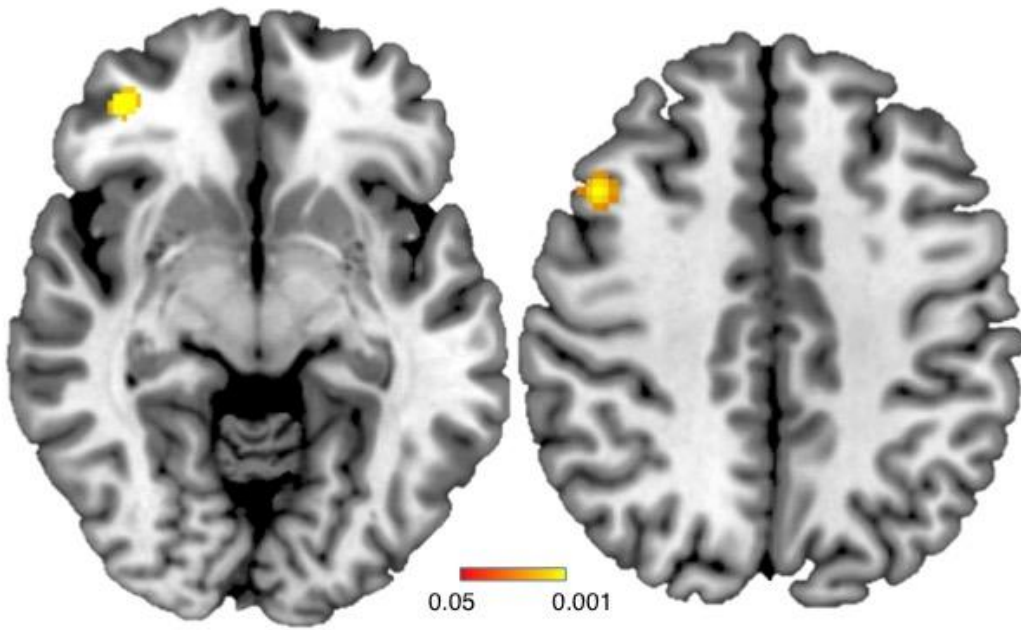

**Supplementary Figure 5: ALE results for delusions in AD meta-analysis.**



## References

- Adolphs R. Human Lesion Studies in the 21st Century. *Neuron* 2016; 90: 1151–1153.
- Amanzio M, D'Agata F, Palermo S, Rubino E, Zucca M, Galati A, et al. Neural correlates of reduced awareness in instrumental activities of daily living in frontotemporal dementia. [Internet]. *Exp. Gerontol.* 2016; 83: 158–64. Available from: <http://www.ncbi.nlm.nih.gov/pubmed/27534380>
- Baez S, Kanske P, Matallana D, Montañes P, Reyes P, Slachevsky A, et al. Integration of Intention and Outcome for Moral Judgment in Frontotemporal Dementia: Brain Structural Signatures. [Internet]. *Neurodegener. Dis.* 2016; 16: 206–17. Available from: <http://www.ncbi.nlm.nih.gov/pubmed/26859768>
- Baez S, Morales JP, Slachevsky A, Torralva T, Matus C, Manes F, et al. Orbitofrontal and limbic signatures of empathic concern and intentional harm in the behavioral variant frontotemporal dementia. [Internet]. *Cortex.* 2016; 75: 20–32. Available from: <http://www.ncbi.nlm.nih.gov/pubmed/26707083>
- Baker M, Penny D. Is there a reproducibility crisis? *Nature* 2016; 533: 452–454.
- Baron JC, Chételat G, Desgranges B, Perchey G, Landeau B, de la Sayette V, et al. In vivo mapping of gray matter loss with voxel-based morphometry in mild Alzheimer's disease. *Neuroimage* 2001; 14: 298–309.
- Benoit M, Koulibaly PM, Migneco O, Darcourt J, Pringuey DJ, Robert PH. Brain perfusion in Alzheimer's disease with and without apathy: A SPECT study with statistical parametric mapping analysis. *Psychiatry Res. - Neuroimaging* 2002; 114: 103–111.
- Bickart KC, Brickhouse M, Negreira A, Sapolsky D, Barrett LF, Dickerson BC. Atrophy in distinct corticolimbic networks in frontotemporal dementia relates to social impairments measured using the Social Impairment Rating Scale. [Internet]. *J. Neurol. Neurosurg. Psychiatry* 2014; 85: 438–48. [cited 2014 Oct 9] Available from: <http://www.ncbi.nlm.nih.gov/pubmed/24133285>
- Boccardi M, Sabattoli F, Laakso MP, Testa C, Rossi R, Beltramello A, et al. Frontotemporal dementia as a neural system disease. [Internet]. *Neurobiol. Aging* 2005; 26: 37–44. Available from: <http://www.ncbi.nlm.nih.gov/pubmed/15585344>
- Boes AD, Prasad S, Liu H, Liu Q, Pascual-Leone A, Caviness VS, et al. Network localization of neurological symptoms from focal brain lesions [Internet]. *Brain* 2015; 138: 3061–3075. [cited 2015 Aug 12] Available from: <http://www.ncbi.nlm.nih.gov/pubmed/26264514>
- Boxer a L, Kramer JH, Du a-T, Schuff N, Weiner MW, Miller BL, et al. Focal right inferotemporal atrophy in AD with disproportionate visual constructive impairment. [Internet]. *Neurology* 2003; 61: 1485–91. Available from: <http://www.pubmedcentral.nih.gov/articlerender.fcgi?artid=2744649&tool=pmcentrez&rendertype=abstract>
- Boxer AL, Geschwind MD, Belfor N, Gorno-Tempini ML, Schauer GF, Miller BL, et al. Patterns of brain atrophy that differentiate corticobasal degeneration syndrome from progressive supranuclear palsy. [Internet]. *Arch. Neurol.* 2006; 63: 81–6. Available from: <http://www.ncbi.nlm.nih.gov/pubmed/16401739>
- Boxer AL, Rankin KP, Miller BL, Schuff N, Weiner M, Gorno-Tempini M-L, et al. Cinguloparietal

atrophy distinguishes Alzheimer disease from semantic dementia. [Internet]. *Arch. Neurol.* 2003; 60: 949–56. Available from: <http://www.ncbi.nlm.nih.gov/pubmed/12873851>

Bozzali M, Filippi M, Magnani G, Cercignani M, Franceschi M, Schiatti E, et al. The contribution of voxel-based morphometry in staging patients with mild cognitive impairment. [Internet]. *Neurology* 2006; 67: 453–60. Available from: <http://www.ncbi.nlm.nih.gov/pubmed/16894107>

Bruen PD, McGeown WJ, Shanks MF, Venneri A. Neuroanatomical correlates of neuropsychiatric symptoms in Alzheimer's disease. [Internet]. *Brain* 2008; 131: 2455–63. Available from: <http://www.ncbi.nlm.nih.gov/pubmed/18669506>

Buckner RL, Sepulcre J, Talukdar T, Krienen FM, Liu H, Hedden T, et al. Cortical Hubs Revealed by Intrinsic Functional Connectivity: Mapping, Assessment of Stability, and Relation to Alzheimer's Disease [Internet]. *J. Neurosci.* 2009; 29: 1860–1873. Available from: <http://www.jneurosci.org/cgi/doi/10.1523/JNEUROSCI.5062-08.2009>

Bullmore ET, Sporns O, Solla SA. Complex brain networks: graph theoretical analysis of structural and functional systems. [Internet]. *Nat. Rev. Neurosci.* 2009; 10: 186–98. Available from: <http://www.ncbi.nlm.nih.gov/pubmed/19190637>

Button KS, Ioannidis JPA, Mokrysz C, Nosek BA, Flint J, Robinson ESJ, et al. Power failure: why small sample size undermines the reliability of neuroscience [Internet]. *Nat. Rev. Neurosci.* 2013; 14: 365–376. Available from: <http://www.nature.com/doi/10.1038/nrn3475>

Carp J. On the plurality of (methodological) worlds: Estimating the analytic flexibility of fmri experiments. *Front. Neurosci.* 2012

Darby RR, Fox MD. Reply: Capgras syndrome: neuroanatomical assessment of brain MRI findings in an adolescent patient. [Internet]. *Brain* 2017; 140: e44. Available from: <http://www.ncbi.nlm.nih.gov/pubmed/28582476> <https://academic.oup.com/brain/article-lookup/doi/10.1093/brain/awx121>

Darby RR, Horn A, Cushman F, Fox MD. Lesion network localization of criminal behavior [Internet]. *Proc. Natl. Acad. Sci.* 2017: 201706587. Available from: <http://www.pnas.org/lookup/doi/10.1073/pnas.1706587115>

Darby RR, Laganier S, Pascual-Leone A, Prasad S, Fox MD. Finding the imposter: brain connectivity of lesions causing delusional misidentifications [Internet]. *Brain* 2017; 140: 497–507. Available from: [http://fdslive.oup.com/www.oup.com/pdf/production\\_in\\_progress.pdf](http://fdslive.oup.com/www.oup.com/pdf/production_in_progress.pdf)

Dermody N, Hornberger M, Piguet O, Hodges JR, Irish M. Prospective Memory Impairments in Alzheimer's Disease and Behavioral Variant Frontotemporal Dementia: Clinical and Neural Correlates. [Internet]. *J. Alzheimers. Dis.* 2016; 50: 425–41. Available from: <http://www.ncbi.nlm.nih.gov/pubmed/26682697>

Dickerson BC, Bakkour A, Salat DH, Feczko E, Pacheco J, Greve DN, et al. The cortical signature of Alzheimer's disease: regionally specific cortical thinning relates to symptom severity in very mild to mild AD dementia and is detectable in asymptomatic amyloid-positive individuals. [Internet]. *Cereb. Cortex* 2009; 19: 497–510. [cited 2014 Jul 15] Available from: <http://www.pubmedcentral.nih.gov/articlerender.fcgi?artid=2638813&tool=pmcentrez&rendertype=abstract>

Ebmeier KP, Glabus MF, Prentice N, Ryman A, Goodwin GM. A voxel-based analysis of cerebral perfusion in dementia and depression of old age [Internet]. 1998; 208: 199–208. Available from: <http://www.scopus.com/inward/record.url?eid=2-s2.0-0031858130&partnerID=MN8TOARS>

Eickhoff SB, Laird AR, Grefkes C, Wang LE, Zilles K, Fox PT. Coordinate-based activation likelihood estimation meta-analysis of neuroimaging data: a random-effects approach based on empirical estimates of spatial uncertainty. [Internet]. *Hum. Brain Mapp.* 2009; 30: 2907–26. [cited 2015 Aug 10] Available from: <http://www.pubmedcentral.nih.gov/articlerender.fcgi?artid=2872071&tool=pmcentrez&rendertype=abstract>

Eklund A, Nichols TE, Knutsson H. Cluster failure: Why fMRI inferences for spatial extent have inflated false-positive rates [Internet]. *Proc. Natl. Acad. Sci.* 2016; 113: 7900–7905. Available from: <http://www.pnas.org/lookup/doi/10.1073/pnas.1602413113>

Fasano A, Laganieri SE, Lam S, Fox MD. Lesions causing freezing of gait localize to a cerebellar functional network. [Internet]. *Ann. Neurol.* 2017; 81: 129–141. [cited 2017 Feb 13] Available from: <http://doi.wiley.com/10.1002/ana.24845>

Fischer DB, Boes AD, Demertzi A, Evrard HC, Laureys S, Edlow BL, et al. A human brain network derived from coma-causing brainstem lesions [Internet]. *Neurology* 2016; 87: 2427–2434. Available from: <http://www.neurology.org/lookup/doi/10.1212/WNL.0000000000003404>

Flanagan EC, Wong S, Dutt A, Tu S, Bertoux M, Irish M, et al. False Recognition in Behavioral Variant Frontotemporal Dementia and Alzheimer’s Disease—Disinhibition or Amnesia? [Internet]. *Front. Aging Neurosci.* 2016; 8: 177. Available from: <http://www.ncbi.nlm.nih.gov/pubmed/27489543>

Fornito A, Zalesky A, Breakspear M. The connectomics of brain disorders [Internet]. *Nat. Rev. Neurosci.* 2015; 16: 159–172. [cited 2015 Feb 20] Available from: <http://www.ncbi.nlm.nih.gov/pubmed/25697159>

Fox MD, Buckner RL, Liu H, Chakravarty MM, Lozano AM, Pascual-Leone A. Resting-state networks link invasive and noninvasive brain stimulation across diverse psychiatric and neurological diseases. [Internet]. *Proc. Natl. Acad. Sci. U. S. A.* 2014; 111: E4367–75. [cited 2016 Mar 4] Available from: <http://www.pubmedcentral.nih.gov/articlerender.fcgi?artid=4205651&tool=pmcentrez&rendertype=abstract>

Fox MD, Greicius M. Clinical applications of resting state functional connectivity. *Front Syst Neurosci* 2010; 4: 1–13.

Fox MD, Raichle ME. Spontaneous fluctuations in brain activity observed with functional magnetic resonance imaging. *Nat. Rev. Neurosci.* 2007; 8: 700–711.

Fox MD, Snyder AZ, Vincent JL, Corbetta M, Van Essen DC, Raichle ME. The human brain is intrinsically organized into dynamic, anticorrelated functional networks. [Internet]. *Proc. Natl. Acad. Sci. U. S. A.* 2005; 102: 9673–8. [cited 2014 Jul 10] Available from: <http://www.pubmedcentral.nih.gov/articlerender.fcgi?artid=1157105&tool=pmcentrez&rendertype=abstract>

Fukuhara R, Ikeda M, Nebu A, Kikuchi T, Maki N, Hokoishi K, et al. Alteration of rCBF in Alzheimer’s disease patients with delusions of theft. [Internet]. *Neuroreport* 2001; 12: 2473–6. Available from:

<http://www.ncbi.nlm.nih.gov/pubmed/11496132>

Garraux G, Salmon E, Peigneux P, Kreisler A, Degueldre C, Lemaire C, et al. Voxel-based distribution of metabolic impairment in corticobasal degeneration. [Internet]. *Mov. Disord.* 2000; 15: 894–904. Available from: <http://www.ncbi.nlm.nih.gov/pubmed/11009197>

Gong Q, He Y. Depression, neuroimaging and connectomics: A selective overview. *Biol. Psychiatry* 2015; 77: 223–235.

Gorno-Tempini ML, Dronkers NF, Rankin KP, Ogar JM, Phengrasamy L, Rosen HJ, et al. Cognition and anatomy in three variants of primary progressive aphasia. [Internet]. *Ann. Neurol.* 2004; 55: 335–46. Available from: <http://www.ncbi.nlm.nih.gov/pubmed/14991811>

Gorno-Tempini ML, Ogar JM, Brambati SM, Wang P, Jeong JH, Rankin KP, et al. Anatomical correlates of early mutism in progressive nonfluent aphasia. [Internet]. *Neurology* 2006; 67: 1849–51. Available from: <http://www.ncbi.nlm.nih.gov/pubmed/16931509>

Greicius MD, Kimmel DL. Neuroimaging insights into network-based neurodegeneration. *Curr. Opin. Neurol.* 2012; 25: 727–734.

Gross RG, Ash S, McMillan CT, Gunawardena D, Powers C, Libon DJ, et al. Impaired information integration contributes to communication difficulty in corticobasal syndrome. [Internet]. *Cogn. Behav. Neurol.* 2010; 23: 1–7. Available from: <http://www.ncbi.nlm.nih.gov/pubmed/20299856>

Grossman M, McMillan C, Moore P, Ding L, Glosser G, Work M, et al. What’s in a name: voxel-based morphometric analyses of MRI and naming difficulty in Alzheimer’s disease, frontotemporal dementia and corticobasal degeneration. [Internet]. *Brain* 2004; 127: 628–49. Available from: <http://www.ncbi.nlm.nih.gov/pubmed/14761903>

Holmes AJ, Hollinshead MO, O’Keefe TM, Petrov VI, Fariello GR, Wald LL, et al. Brain Genomics Superstruct Project initial data release with structural, functional, and behavioral measures. *Sci. Data* 2015; 2: 1–16.

Horn A, Reich M, Vorwerk J, Li N, Wenzel G, Fang Q, et al. Connectivity predicts deep brain stimulation outcome in Parkinson’s disease [Internet]. *Ann. Neurol.* 2017: 1–39. Available from: <http://www.ncbi.nlm.nih.gov/pubmed/28586141>

Hosaka K, Ishii K, Sakamoto S, Mori T, Sasaki M, Hirono N, et al. Voxel-based comparison of regional cerebral glucose metabolism between PSP and corticobasal degeneration. [Internet]. *J. Neurol. Sci.* 2002; 199: 67–71. Available from: <http://www.ncbi.nlm.nih.gov/pubmed/12084445>

Hu WT, McMillan C, Libon D, Leight S, Forman M, Lee VM-Y, et al. Multimodal predictors for Alzheimer disease in nonfluent primary progressive aphasia. [Internet]. *Neurology* 2010; 75: 595–602. Available from: <http://www.ncbi.nlm.nih.gov/pubmed/20713948>

Huey ED, Goveia EN, Paviol S, Pardini M, Krueger F, Zamboni G, et al. Executive dysfunction in frontotemporal dementia and corticobasal syndrome [Internet]. *Neurology* 2009; 72: 453–459. [cited 2015 Oct 21] Available from: <http://www.pubmedcentral.nih.gov/articlerender.fcgi?artid=2677529&tool=pmcentrez&rendertype=abstract>

Ibáñez V, Pietrini P, Alexander GE, Furey ML, Teichberg D, Rajapakse JC, et al. Regional glucose metabolic abnormalities are not the result of atrophy in Alzheimer’s disease. *Neurology* 1998; 50:

1585–1593.

Insel T, Cuthbert B, Garvey M, Heinssen R, Pine DS, Quinn K, et al. Research domain criteria (RDoC): toward a new classification framework for research on mental disorders. [Internet]. *Am. J. Psychiatry* 2010; 167: 748–51. Available from: <http://www.ncbi.nlm.nih.gov/pubmed/20595427>

Irish M, Eyre N, Dermody N, O’Callaghan C, Hodges JR, Hornberger M, et al. Neural Substrates of Semantic Prospection – Evidence from the Dementias [Internet]. *Front. Behav. Neurosci.* 2016; 10: 1–12. Available from: <http://journal.frontiersin.org/Article/10.3389/fnbeh.2016.00096/abstract>

Irish M, Hodges JR, Piguet O. Episodic future thinking is impaired in the behavioural variant of frontotemporal dementia [Internet]. *Cortex* 2013; 49: 2377–2388. Available from: <http://dx.doi.org/10.1016/j.cortex.2013.03.002>

Irish M, Hornberger M, El Wahsh S, Lam BYK, Lah S, Miller L, et al. Grey and white matter correlates of recent and remote autobiographical memory retrieval -insights from the dementias. *PLoS One* 2014; 9

Ishii K, Ishii K, Sasaki H, Sasaki H, Kono AK, Kono AK, et al. Comparison of gray matter and metabolic reduction in mild Alzheimer’s disease using FDG-PET and voxel-based morphometric MR studies. [Internet]. *Eur. J. Nucl. Med. Mol. Imaging* 2005; 32: 959–63. Available from: <http://www.ncbi.nlm.nih.gov/pubmed/15800784>

Ishii K, Sasaki M, Kitagaki H, Yamaji S, Sakamoto S, Matsuda K, et al. Reduction of cerebellar glucose metabolism in advanced Alzheimer’s disease. [Internet]. *J. Nucl. Med.* 1997; 38: 925–8. Available from: <http://www.ncbi.nlm.nih.gov/pubmed/9189143>

Ishii K, Sasaki M, Yamaji S, Sakamoto S, Kitagaki H, Mori E. Relatively preserved hippocampal glucose metabolism in mild Alzheimer’s disease. *Dement. Geriatr. Cogn. Disord.* 1998; 9: 317–322.

Ismail Z, Nguyen MQ, Fischer CE, Schweizer TA, Mulsant BH, Mamo D. Neurobiology of delusions in Alzheimer’s disease. *Curr. Psychiatry Rep.* 2011; 13: 211–218.

Jack CR, Knopman DS, Jagust WJ, Shaw LM, Aisen PS, Weiner MW, et al. Hypothetical model of dynamic biomarkers of the Alzheimer’s pathological cascade. *Lancet Neurol.* 2010; 9: 119–128.

Jones DT, Graff-Radford J, Lowe VJ, Wiste HJ, Gunter JL, Senjem ML, et al. Tau, amyloid, and cascading network failure across the Alzheimer’s disease spectrum [Internet]. *Cortex* 2017; 97: 143–159. Available from: <https://doi.org/10.1016/j.cortex.2017.09.018>

Jones DT, Knopman DS, Gunter JL, Graff-Radford J, Vemuri P, Boeve BF, et al. Cascading network failure across the Alzheimer’s disease spectrum. *Brain* 2016; 139: 547–562.

Juh R, Pae C-U, Kim T-S, Lee C-U, Choe B, Suh T. Cerebral glucose metabolism in corticobasal degeneration comparison with progressive supranuclear palsy using statistical mapping analysis. [Internet]. *Neurosci. Lett.*; 383: 22–7. Available from: <http://www.ncbi.nlm.nih.gov/pubmed/15936506>

Kalpouzos G, Eustache F, De La Sayette V, Viader F, Chételat G, Desgranges B. Working memory and FDG-PET dissociate early and late onset Alzheimer disease patients. *J. Neurol.* 2005; 252: 548–558.

Kanda T, Ishii K, Uemura T, Miyamoto N, Yoshikawa T, Kono AK, et al. Comparison of grey matter and metabolic reductions in frontotemporal dementia using FDG-PET and voxel-based

morphometric MR studies. *Eur. J. Nucl. Med. Mol. Imaging* 2008; 35: 2227–2234.

Kim EJ, Cho SS, Jeong Y, Park KC, Kang SJ, Kang E, et al. Glucose metabolism in early onset versus late onset Alzheimer's disease: An SPM analysis of 120 patients. *Brain* 2005; 128: 1790–1801.

Kipps CM, Nestor PJ, Acosta-Cabronero J, Arnold R, Hodges JR. Understanding social dysfunction in the behavioural variant of frontotemporal dementia: The role of emotion and sarcasm processing. *Brain* 2009; 132: 592–603.

Kogure D, Matsuda H, Ohnishi T, Asada T, Uno M, Kunihiro T, et al. Longitudinal evaluation of early Alzheimer's disease using brain perfusion SPECT. [Internet]. *J. Nucl. Med.* 2000; 41: 1155–62. Available from: <http://www.ncbi.nlm.nih.gov/pubmed/10914904>

Laganieri S, Boes AD, Fox MD. Network localization of hemichorea-hemiballismus [Internet]. *Neurology* 2016; 86: 2187–2195. Available from: <http://www.neurology.org/lookup/doi/10.1212/WNL.0000000000002741>

Lancaster JL, Laird AR, Fox PM, Glahn DE, Fox PT. Automated analysis of meta-analysis networks. *Hum. Brain Mapp.* 2005; 25: 174–184.

Lee SE, Rabinovici GD, Mayo MC, Wilson SM, Seeley WW, DeArmond SJ, et al. Clinicopathological correlations in corticobasal degeneration. [Internet]. *Ann. Neurol.* 2011; 70: 327–40. Available from: <http://www.ncbi.nlm.nih.gov/pubmed/21823158>

Lee Y-M, Chung Y-I, Park J-M, Lee B-D, Moon E, Jeong H-J, et al. Decreased gray matter volume is associated with the subtypes of psychotic symptoms in patients with antipsychotic-naïve mild or moderate Alzheimer's disease: A voxel-based morphometry study. [Internet]. *Psychiatry Res.* 2016; 249: 45–51. Available from: <http://www.ncbi.nlm.nih.gov/pubmed/27000306>

Lee YC, Liu RS, Liao YC, Sun CM, Wang PS, Wang PN, et al. Statistical parametric mapping of brain SPECT perfusion abnormalities in patients with Alzheimer's disease [Internet]. *Eur Neurol* 2003; 49: 142–145. Available from: [http://www.ncbi.nlm.nih.gov/entrez/query.fcgi?cmd=Retrieve&db=PubMed&dopt=Citation&list\\_uids=12646756](http://www.ncbi.nlm.nih.gov/entrez/query.fcgi?cmd=Retrieve&db=PubMed&dopt=Citation&list_uids=12646756)

Lehmann M, Madison CM, Ghosh PM, Seeley WW, Mormino E, Greicius MD, et al. Intrinsic connectivity networks in healthy subjects explain clinical variability in Alzheimer's disease [Internet]. *Proc. Natl. Acad. Sci.* 2013; 110: 11606–11611. Available from: <http://www.pnas.org/cgi/doi/10.1073/pnas.1221536110>

Luis E, Ortiz A, Eudave L, Ortega-Cubero S, Borroni B, Van Der Zee J, et al. Neuroimaging Correlates of Frontotemporal Dementia Associated with SQSTM1 Mutations. *J. Alzheimer's Dis.* 2016; 53: 303–313.

Mandelli ML, Vilaplana E, Brown JA, Hubbard HI, Binney RJ, Attygalle S, et al. Healthy brain connectivity predicts atrophy progression in non-fluent variant of primary progressive aphasia. *Brain* 2016; 139: 2778–2791.

Mandelli ML, Vitali P, Santos M, Henry M, Gola K, Rosenberg L, et al. Two insular regions are differentially involved in behavioral variant FTD and nonfluent/agrammatic variant PPA [Internet]. *Cortex* 2016; 74: 149–157. Available from: <http://dx.doi.org/10.1016/j.cortex.2015.10.012>

Massimo L, Libon DJ, Chandrasekaran K, Dreyfuss M, McMillan CT, Rascovsky K, et al. Self-appraisal

in behavioural variant frontotemporal degeneration [Internet]. *J. Neurol. Neurosurg. Psychiatry* 2013; 84: 148–153. Available from: <http://jnnp.bmj.com/lookup/doi/10.1136/jnnp-2012-303153>

Matsuda H, Kanetaka H, Ohnishi T, Asada T, Imabayashi E, Nakano S, et al. Brain SPET abnormalities in Alzheimer's disease before and after atrophy correction. *Eur. J. Nucl. Med.* 2002; 29: 1502–1505.

Matsuoka T, Narumoto J, Shibata K, Okamura A, Nakamura K, Okuyama C, et al. Insular hypoperfusion correlates with the severity of delusions in individuals with Alzheimer's disease. [Internet]. *Dement. Geriatr. Cogn. Disord.* 2010; 29: 287–93. Available from: <http://www.ncbi.nlm.nih.gov/pubmed/20375510>

McMillan CT, Boyd C, Gross RG, Weinstein J, Firn K, Toledo JB, et al. Multimodal imaging evidence of pathology-mediated disease distribution in corticobasal syndrome. [Internet]. *Neurology* 2016; 87: 1227–34. Available from: <http://www.ncbi.nlm.nih.gov/pubmed/27543644>

Mega MS, Lee L, Dinov ID, Mishkin F, Toga AW, Cummings JL. Cerebral correlates of psychotic symptoms in Alzheimer's disease. [Internet]. *J. Neurol. Neurosurg. Psychiatry* 2000; 69: 167–71. [cited 2016 Sep 19] Available from: <http://www.ncbi.nlm.nih.gov/pubmed/10896687>

Moran EK, Becker JA, Satlin A, Lyoo IK, Fischman AJ, Johnson KA. Psychosis of Alzheimer's disease: Gender differences in regional perfusion. [Internet]. *Neurobiol. Aging* 2008; 29: 1218–25. Available from: <http://www.ncbi.nlm.nih.gov/pubmed/17408808>

Morgan B, Gross RG, Clark R, Dreyfuss M, Boller A, Camp E, et al. Some is not enough: quantifier comprehension in corticobasal syndrome and behavioral variant frontotemporal dementia. [Internet]. *Neuropsychologia* 2011; 49: 3532–41. Available from: <http://www.ncbi.nlm.nih.gov/pubmed/21930136>

Mosconi L, Pupi A, De Cristofaro MT, Fayyaz M, Sorbi S, Herholz K. Functional Interactions of the Entorhinal Cortex: An 18F-FDG PET Study on Normal Aging and Alzheimer's Disease [Internet]. *J. Nucl. Med.* 2004; 45: 382–392. Available from: <http://jnm.snmjournals.org/cgi/content/abstract/45/3/382>

Nakaaki S, Sato J, Torii K, Oka M, Negi A, Nakamae T, et al. Neuroanatomical abnormalities before onset of delusions in patients with Alzheimer's disease: a voxel-based morphometry study. [Internet]. *Neuropsychiatr. Dis. Treat.* 2013; 9: 1–8. Available from: <http://www.ncbi.nlm.nih.gov/pubmed/23293521>

Nakano S, Yamashita F, Matsuda H, Kodama C, Yamada T. Relationship between Delusions and Regional Cerebral Blood Flow in Alzheimer's Disease [Internet]. *Dement. Geriatr. Cogn. Disord.* 2005; 21: 16–21. [cited 2016 Sep 19] Available from: <http://www.ncbi.nlm.nih.gov/pubmed/16254426>

Nakano S, Yamashita F, Matsuda H, Kodama C, Yamada T. Relationship between delusions and regional cerebral blood flow in Alzheimer's disease. [Internet]. *Dement. Geriatr. Cogn. Disord.* 2006; 21: 16–21. Available from: <http://www.ncbi.nlm.nih.gov/pubmed/16254426>

Nakatsuka M, Meguro K, Tsuboi H, Nakamura K, Akanuma K, Yamaguchi S. Content of delusional thoughts in Alzheimer's disease and assessment of content-specific brain dysfunctions with BEHAVE-AD-FW and SPECT. [Internet]. *Int. psychogeriatrics* 2013; 25: 939–48. Available from: <http://www.ncbi.nlm.nih.gov/pubmed/23433495>

Nestor PJ, Graham NL, Fryer TD, Williams GB, Patterson K, Hodges JR. Progressive non-fluent aphasia is associated with hypometabolism centred on the left anterior insula. [Internet]. *Brain* 2003; 126: 2406–18. Available from: <http://www.ncbi.nlm.nih.gov/pubmed/12902311>

Neumann J, Lohmann G, Derrfuss J, Von Cramon DY. Meta-analysis of functional imaging data using replicator dynamics. *Hum. Brain Mapp.* 2005; 25: 165–173.

Ohnishi T, Matsuda H, Tabira T, Asada T, Uno M. Changes in brain morphology in Alzheimer disease and normal aging: is Alzheimer disease an exaggerated aging process? *AJNR. Am. J. Neuroradiol.* 2001; 22: 1680–1685.

Open Science Collaboration. PSYCHOLOGY. Estimating the reproducibility of psychological science. [Internet]. *Science* 2015; 349: aac4716. Available from: <http://www.ncbi.nlm.nih.gov/pubmed/26315443>

Ossenkuppe R, Pijnenburg YAL, Perry DC, Cohn-Sheehy BI, Scheltens NME, Vogel JW, et al. The behavioural/dysexecutive variant of Alzheimer's disease: clinical, neuroimaging and pathological features [Internet]. *Brain* 2015; 138: 2732–2749. Available from: <https://academic.oup.com/brain/article-lookup/doi/10.1093/brain/awv191>

Pardini M, Huey ED, Cavanagh AL, Grafman J. Olfactory function in corticobasal syndrome and frontotemporal dementia [Internet]. *Arch. Neurol.* 2009; 66: 92–96. Available from: <http://archneur.jamanetwork.com/article.aspx?doi=10.1001/archneurol.2008.521>

Pereira JMS, Williams GB, Acosta-Cabronero J, Pengas G, Spillantini MG, Xuereb JH, et al. Atrophy patterns in histologic vs clinical groupings of frontotemporal lobar degeneration. [Internet]. *Neurology* 2009; 72: 1653–60. Available from: <http://www.ncbi.nlm.nih.gov/pubmed/19433738>

Poldrack RA, Baker CI, Durnez J, Gorgolewski KJ, Matthews PM, Munafò MR, et al. Scanning the horizon: towards transparent and reproducible neuroimaging research [Internet]. *Nat. Rev. Neurosci.* 2017; 18: 115–126. Available from: <http://www.nature.com/doifinder/10.1038/nrn.2016.167>

Prince M, Bryce R, Albanese E, Wimo A, Ribeiro W, Ferri CP. The global prevalence of dementia: A systematic review and metaanalysis [Internet]. *Alzheimer's Dement.* 2013; 9: 63–75.e2. [cited 2016 Jun 22] Available from: <http://dx.doi.org/10.1016/j.jalz.2012.11.007>

Radua J, Mataix-Cols D, Phillips ML, El-Hage W, Kronhaus DM, Cardoner N, et al. A new meta-analytic method for neuroimaging studies that combines reported peak coordinates and statistical parametric maps [Internet]. *Eur. Psychiatry* 2012; 27: 605–611. Available from: <http://dx.doi.org/10.1016/j.eurpsy.2011.04.001>

Raj A, Kuceyeski A, Weiner M. A Network Diffusion Model of Disease Progression in Dementia [Internet]. *Neuron* 2012; 73: 1204–1215. Available from: <http://dx.doi.org/10.1016/j.neuron.2011.12.040>

Robinson JL, Laird AR, Glahn DC, Blangero J, Sanghera MK, Pessoa L, et al. The functional connectivity of the human caudate: An application of meta-analytic connectivity modeling with behavioral filtering. *Neuroimage* 2012; 60: 117–129.

Robinson JL, Laird AR, Glahn DC, Lovallo WR, Fox PT. Metaanalytic connectivity modeling: Delineating the functional connectivity of the human amygdala. *Hum. Brain Mapp.* 2010; 31: 173–



184.

Sakamoto S, Ishii K, Sasaki M, Hosaka K, Mori T, Matsui M, et al. Differences in cerebral metabolic impairment between early and late onset types of Alzheimer's disease. [Internet]. *J. Neurol. Sci.* 2002; 200: 27–32. Available from: <http://dx.doi.org/10.1016/j.neurobiolaging.2013.02.013><http://www.ncbi.nlm.nih.gov/pubmed/12127672><http://www.pubmedcentral.nih.gov/articlerender.fcgi?artid=1738480&tool=pmcentrez&rendertype=>

Salmon E, Collette F, Degueldre C, Lemaire C, Franck G. Voxel-based analysis of confounding effects of age and dementia severity on cerebral metabolism in Alzheimer's disease. *Hum. Brain Mapp.* 2000; 10: 39–48.

Schroeter ML, Neumann J. Combined imaging markers dissociate Alzheimer's disease and frontotemporal lobar degeneration - An ALE meta-analysis. *Front. Aging Neurosci.* 2011; 3: 1–6.

Seeley WW. Mapping Neurodegenerative Disease Onset and Progression [Internet]. Cold Spring Harb. *Perspect. Biol.* 2017; 9: a023622. Available from: <http://cshperspectives.cshlp.org/lookup/doi/10.1101/cshperspect.a023622>

Seeley WW, Crawford RK, Zhou J, Miller BL, Greicius MD. Neurodegenerative Diseases Target Large-Scale Human Brain Networks [Internet]. *Neuron* 2009; 62: 42–52. [cited 2016 Oct 25] Available from: <http://linkinghub.elsevier.com/retrieve/pii/S0896627309002499>

Serra L, Perri R, Cercignani M, Spanò B, Fadda L, Marra C, et al. Are the behavioral symptoms of Alzheimer's disease directly associated with neurodegeneration? [Internet]. *J. Alzheimers. Dis.* 2010; 21: 627–39. Available from: <http://www.ncbi.nlm.nih.gov/pubmed/20555138>

Smith SM, Fox PT, Miller KL, Glahn DC, Fox PM, Mackay CE, et al. Correspondence of the brain's functional architecture during activation and rest [Internet]. *Proc. Natl. Acad. Sci.* 2009; 106: 13040–13045. Available from: <http://www.pnas.org/cgi/doi/10.1073/pnas.0905267106>

Staff RT, Venneri A, Gemmell HG, Shanks MF, Pestell SJ, Murray AD. HMPAO SPECT imaging of Alzheimer's disease patients with similar content-specific autobiographic delusion: comparison using statistical parametric mapping. [Internet]. *J. Nucl. Med.* 2000; 41: 1451–5. Available from: <http://www.ncbi.nlm.nih.gov/pubmed/10994722>

Sultzer DL, Leskin LP, Melrose RJ, Harwood DG, Narvaez TA, Ando TK, et al. Neurobiology of delusions, memory, and insight in Alzheimer disease. [Internet]. *Am. J. Geriatr. Psychiatry* 2014; 22: 1346–55. Available from: <http://www.ncbi.nlm.nih.gov/pubmed/24021220>

Thomas Yeo BT, Krienen FM, Sepulcre J, Sabuncu MR, Lashkari D, Hollinshead M, et al. The organization of the human cerebral cortex estimated by intrinsic functional connectivity [Internet]. *J. Neurophysiol.* 2011; 106: 1125–1165. [cited 2016 Jul 11] Available from: <http://www.ncbi.nlm.nih.gov/pubmed/21653723>

Torok J, Maia PD, Powell F, Pandya S, Raj A. A method for inferring regional origins of neurodegeneration [Internet]. *Brain* 2018; 141: 863–876. Available from: <https://academic.oup.com/tropej/article-lookup/doi/10.1093/tropej/fmw080>

Tu S, Wong S, Hodges JR, Irish M, Piguet O, Hornberger M. Lost in spatial translation - A novel tool to objectively assess spatial disorientation in Alzheimer's disease and frontotemporal dementia

[Internet]. *Cortex* 2015; 67: 83–94. Available from: <http://dx.doi.org/10.1016/j.cortex.2015.03.016>

Wager TD, Jonides J, Reading S. Neuroimaging studies of shifting attention: A meta-analysis. *Neuroimage* 2004; 22: 1679–1693.

Weiner MW, Veitch DP. Introduction to special issue: Overview of Alzheimer's Disease Neuroimaging Initiative [Internet]. *Alzheimer's Dement.* 2015; 11: 730–733. Available from: <http://dx.doi.org/10.1016/j.jalz.2015.05.007>

Whitwell JL, Jack CR, Przybelski SA, Parisi JE, Senjem ML, Boeve BF, et al. Temporoparietal atrophy: A marker of AD pathology independent of clinical diagnosis [Internet]. *Neurobiol. Aging* 2011; 32: 1531–1541. Available from: <http://linkinghub.elsevier.com/retrieve/pii/S019745800900342X>

Wiepert DA, Lowe VJ, Knopman DS, Boeve BF, Graff-Radford J, Petersen RC, et al. A robust biomarker of large-scale network failure in Alzheimer's disease [Internet]. *Alzheimer's Dement. Diagnosis, Assess. Dis. Monit.* 2017; 6: 152–161. Available from: <http://dx.doi.org/10.1016/j.dadm.2017.01.004>

Wilson SM, Dronkers NF, Ogar JM, Jang J, Growdon ME, Agosta F, et al. Neural correlates of syntactic processing in the nonfluent variant of primary progressive aphasia. [Internet]. *J. Neurosci.* 2010; 30: 16845–54. Available from: <http://www.ncbi.nlm.nih.gov/pubmed/21159955>

Wolpe N, Moore JW, Rae CL, Rittman T, Altena E, Haggard P, et al. The medial frontal-prefrontal network for altered awareness and control of action in corticobasal syndrome. [Internet]. *Brain* 2014; 137: 208–20. Available from: <http://www.ncbi.nlm.nih.gov/pubmed/24293266>

Wong S, Bertoux M, Savage G, Hodges JR, Piguet O, Hornberger M. Comparison of Prefrontal Atrophy and Episodic Memory Performance in Dysexecutive Alzheimer's Disease and Behavioral-Variant Frontotemporal Dementia. *J. Alzheimer's Dis.* 2016; 51: 889–903.

Yarkoni T, Poldrack RA, Nichols TE, Van Essen DC, Wager TD. Large-scale automated synthesis of human functional neuroimaging data [Internet]. *Nat. Methods* 2011; 8: 665–670. [cited 2016 Sep 19] Available from: <http://www.nature.com/doifinder/10.1038/nmeth.1635>

Zahn R, Buechert M, Overmans J, Talazko J, Specht K, Ko CW, et al. Mapping of temporal and parietal cortex in progressive nonfluent aphasia and Alzheimer's disease using chemical shift imaging, voxel-based morphometry and positron emission tomography. *Psychiatry Res. - Neuroimaging* 2005; 140: 115–131.

Zamboni G, Huey ED, Krueger F, Nichelli PF, Grafman J. Apathy and disinhibition in frontotemporal dementia: Insights into their neural correlates. *Neurology* 2008; 71: 736–742.

Zhou J, Gennatas ED, Kramer JH, Miller BL, Seeley WW. Predicting Regional Neurodegeneration from the Healthy Brain Functional Connectome [Internet]. *Neuron* 2012; 73: 1216–1227. Available from: <http://dx.doi.org/10.1016/j.neuron.2012.03.004>

Zhou J, Greicius MD, Gennatas ED, Growdon ME, Jang JY, Rabinovici GD, et al. Divergent network connectivity changes in behavioural variant frontotemporal dementia and Alzheimer's disease. *Brain* 2010; 133: 1352–1367.
